# Supplementary material for: Oriented self-assembly of metal–organic frameworks driven by photoinitiated monomer polymerization
Source: Royal Society of Chemistry journal article supplement (doi:10.1039/d2ra03161b), 2022-01-01
Supplement: d2ra03161b1.pdf [file d2ra03161b1.pdf]

## Supporting Information

# Oriented self-assembly of metal-organic frameworks driven by photoinitiated monomer polymerization

*Fuqiang Fan\**, *Zhihui Zhang*, *Qingqi Zeng*, *Liying Zhang*, *Xuemin Zhang*, *Tieqiang Wang* and *Yu Fu\**

Department of Chemistry, College of Sciences, Northeastern University, Shenyang,  
110819, P. R. China.

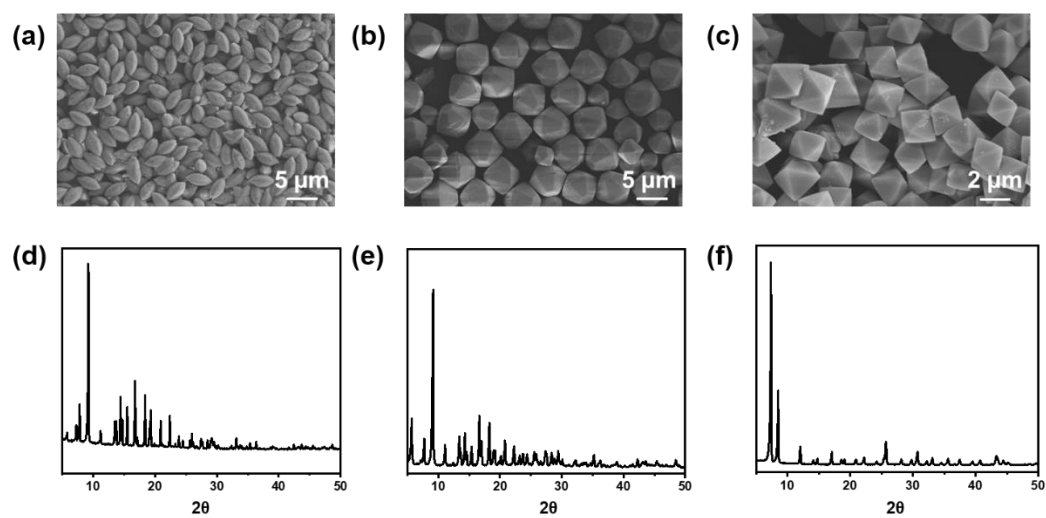

**Figure S1.** SEM images and PXRD patterns of the MOF particles. (a, d) MIL-96 spindle morphology; (b, e) MIL-96 hexagonal bifrustum morphology; (c, f) UIO-66 octahedral morphology.

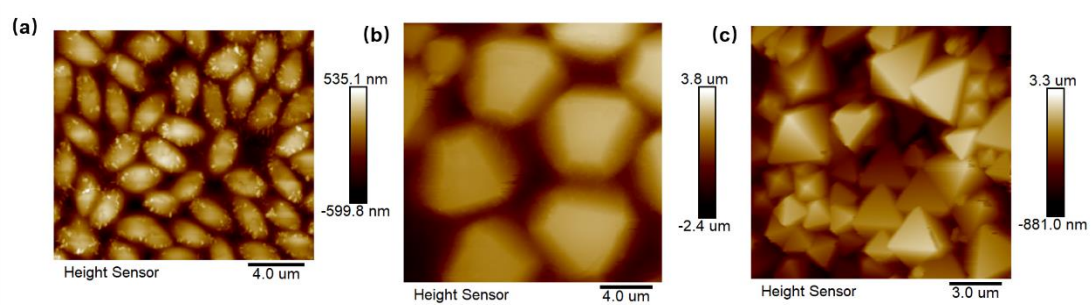

**Figure S2.** AFM images of the MOF films. (a) MIL-96 spindle morphology; (b) MIL-96 hexagonal bifrustum morphology; (c) UIO-66 octahedral morphology.

**Table S1.** (a) Crystallographic preferred orientation (CPO) index equation. If the CPO value is >1, it means the MOF material show a preferred orientation in crystal plane. (b) CPO values of MOF film fabricated using CH<sub>2</sub>Cl<sub>2</sub> as the casting solvent.

**(a)**

$$CPO \frac{(X)}{(Y)} = \frac{\left(\frac{I_F^{(X)}}{I_F^{(Y)}}\right) - \left(\frac{I_P^{(X)}}{I_P^{(Y)}}\right)}{\left(\frac{I_P^{(X)}}{I_P^{(Y)}}\right)}$$

I: intensity of reflection of X or Y

F: film

P: power

**(b)**

| CPO (X/Y)     | UIO-66 polymer film |
|---------------|---------------------|
| CPO (111/200) | 2.15                |

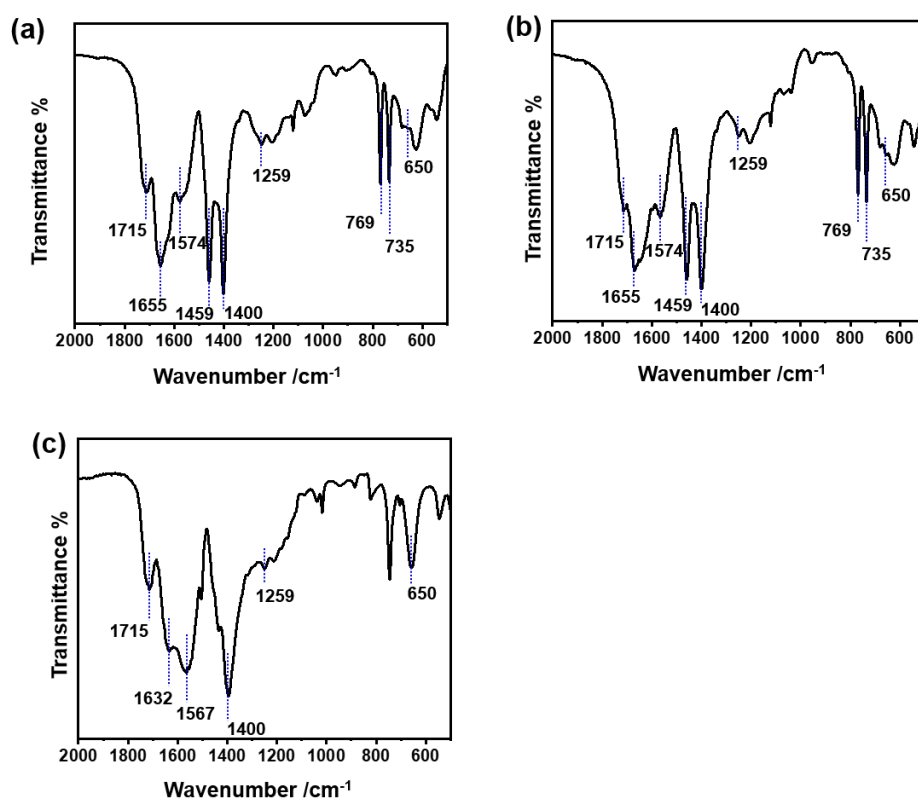

**Figure S3.** FT-IR spectrum of the MOF films. (a) MIL-96 spindle morphology; (b) MIL-96 hexagonal bifrustum morphology; (c) UIO-66 octahedral morphology.

The samples (a) and (b) were both composited of MIL-96 and polymer, resulting in the similar IR peaks. The vibration absorption of C=O at  $1712\text{ cm}^{-1}$  and  $1259\text{ cm}^{-1}$  of C-N belongs to polyurethane;  $1655\text{ cm}^{-1}$  and  $1574\text{ cm}^{-1}$  can be assigned to symmetric stretching, whereas the peaks at  $1459\text{ cm}^{-1}$  and  $1400\text{ cm}^{-1}$  belongs to symmetric stretching of carbonyl group; the band at  $756\text{ cm}^{-1}$  and  $735\text{ cm}^{-1}$  are ascribed to the C-H bending vibration in the aromatic ring; the band at  $650\text{ cm}^{-1}$  belongs to the disulfide bonds. The peaks at  $1632\text{ cm}^{-1}$  and  $1567\text{ cm}^{-1}$  in sample (c) are assigned to symmetric stretching of carbonyl group.

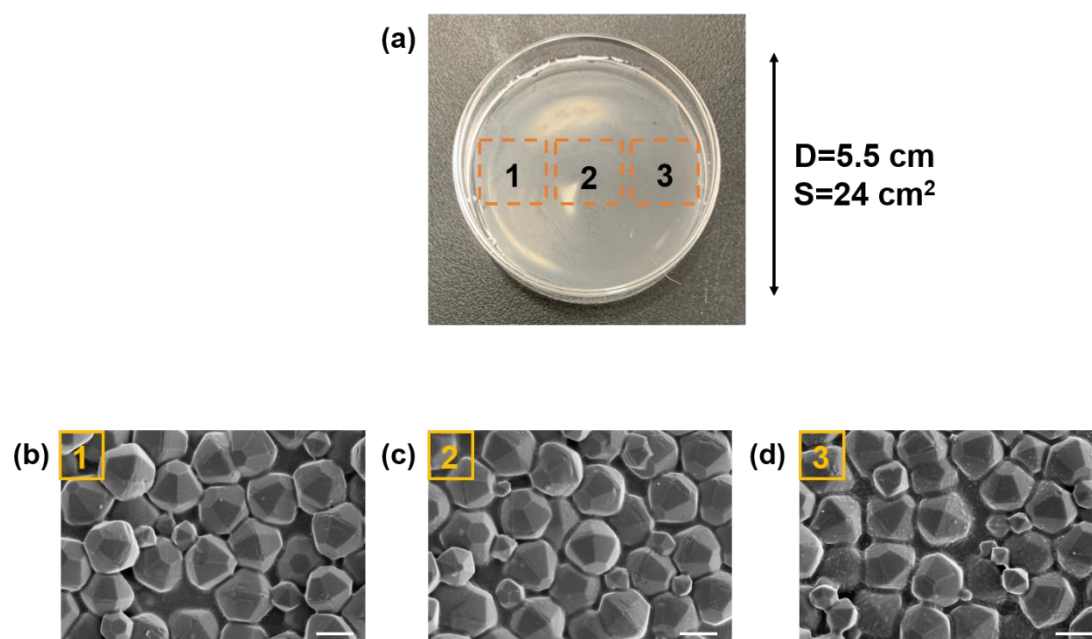

**Figure S4.** (a) Photograph of hexagonal bifrustum MIL-96 prepared by  $\text{CH}_2\text{Cl}_2$  as the casting solvent. (b-d) SEM images of MOF film sampled at three different positions.

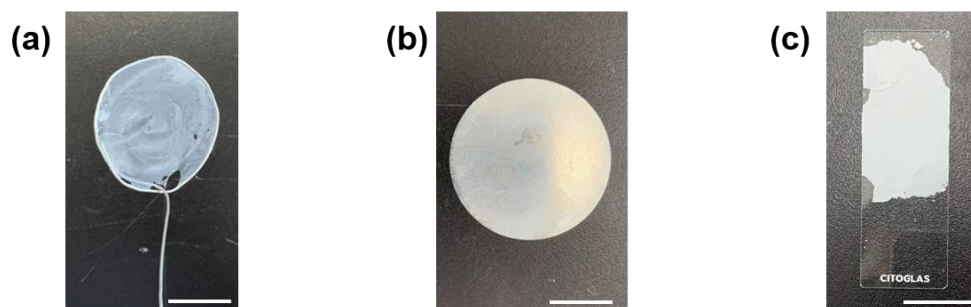

**Figure S5.** Photographs of hexagonal bifrustum MIL-96 films prepared by  $\text{CH}_2\text{Cl}_2$  as free-standing (a), or transferred to Al foil (b) and glass (c).

**Table S2.** Properties of casting solvents.

| <b>Solvent</b>                      | <b>Density<br/>(g/cm<sup>3</sup>)</b> | <b>Boiling<br/>Point (°C)</b> | <b>Interfacial tension<br/>(mN/m)</b> |
|-------------------------------------|---------------------------------------|-------------------------------|---------------------------------------|
| <b>THF</b>                          | <b>0.888</b>                          | <b>66</b>                     | <b>-</b>                              |
| <b>DMSO</b>                         | <b>1.1</b>                            | <b>189</b>                    | <b>-</b>                              |
| <b>Ethyl acetate</b>                | <b>0.9</b>                            | <b>77.2</b>                   | <b>54</b>                             |
| <b>CH<sub>2</sub>Cl<sub>2</sub></b> | <b>1.325</b>                          | <b>39.75</b>                  | <b>56</b>                             |
| <b>CHCl<sub>3</sub></b>             | <b>1.428</b>                          | <b>61.2</b>                   | <b>66</b>                             |
| <b>Toluene</b>                      | <b>0.872</b>                          | <b>110.6</b>                  | <b>76</b>                             |

---

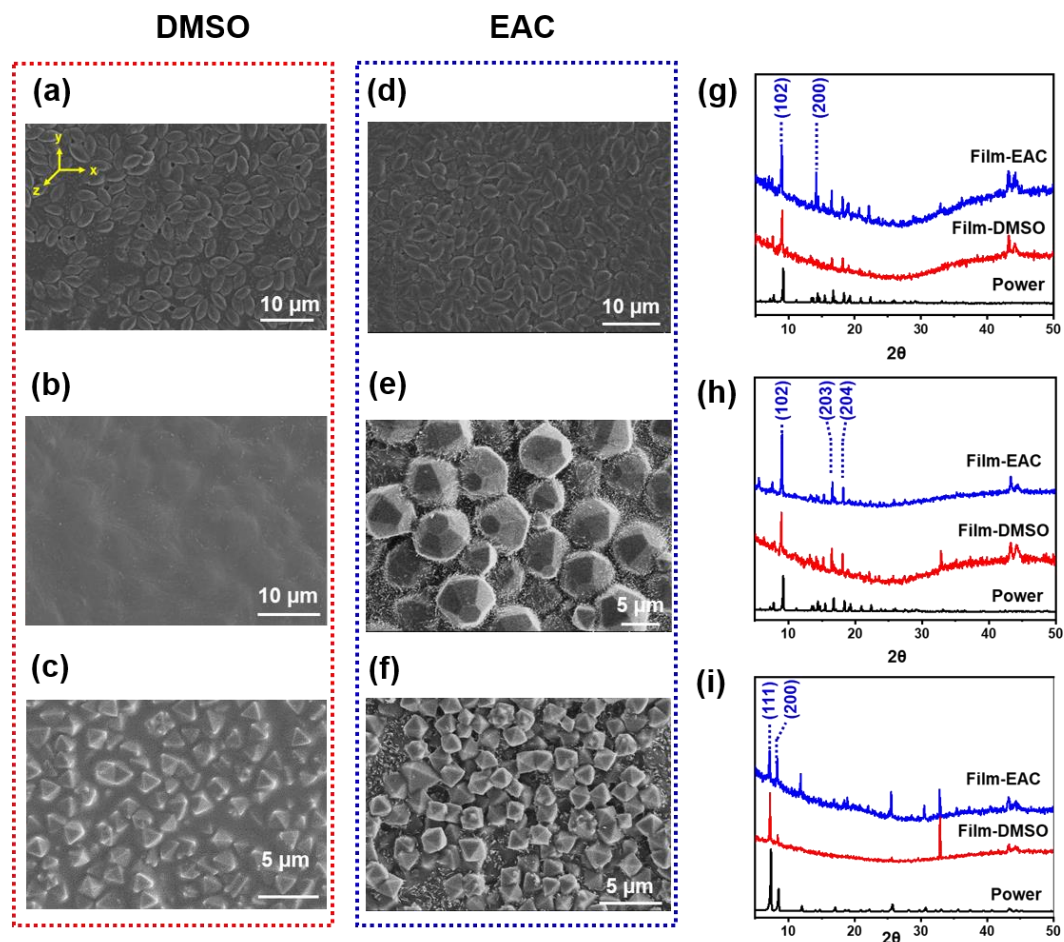

**Figure S6.** SEM images of the bottom surface of MIL-96 spindle morphology film, MIL-96 hexagonal bifrustum morphology film, UIO-66 octahedral morphology film prepared using different solvent: (a-c) DMSO; (d-f) EAC. PXRD patterns of the film using different MOF and solvents: (g) spindle morphology of MIL-96; (h) hexagonal bifrustum morphology of MIL-96; (i) octahedral morphology of UIO-66.

**Table S3.** CPO values of MOF films fabricated using different casting solvents.

| CPO (X/Y)     | Solvent           | UIO-66 polymer film |
|---------------|-------------------|---------------------|
| CPO (200/111) | EAC               | 0.589               |
| CPO (111/200) | CHCl <sub>3</sub> | 1.55                |
| CPO (111/200) | THF               | 21                  |

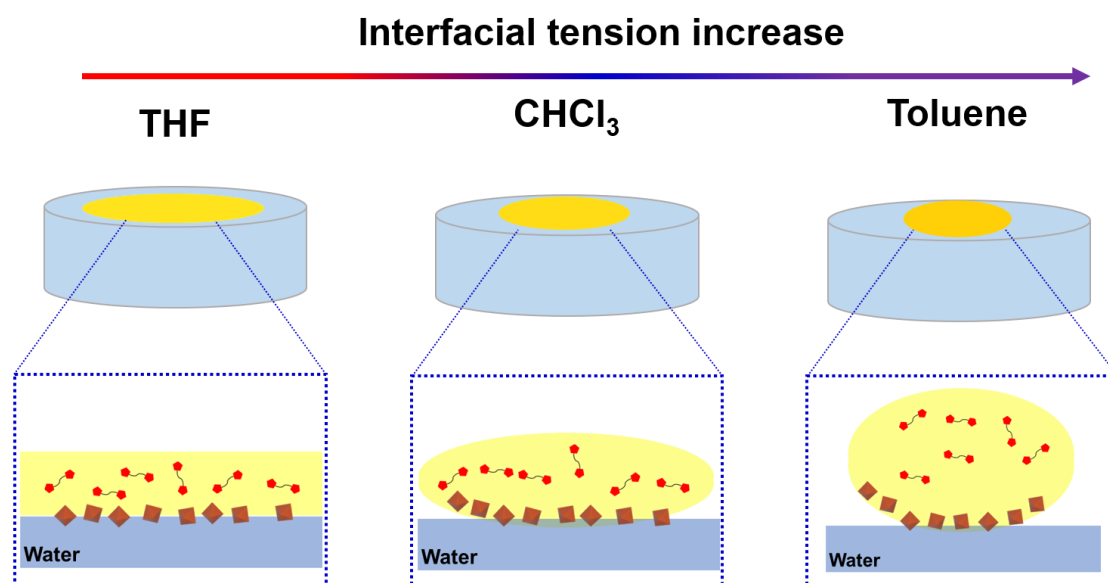

**Figure S7.** Schematic illustration of the alignment of the MOF particles at different water-liquid interface.

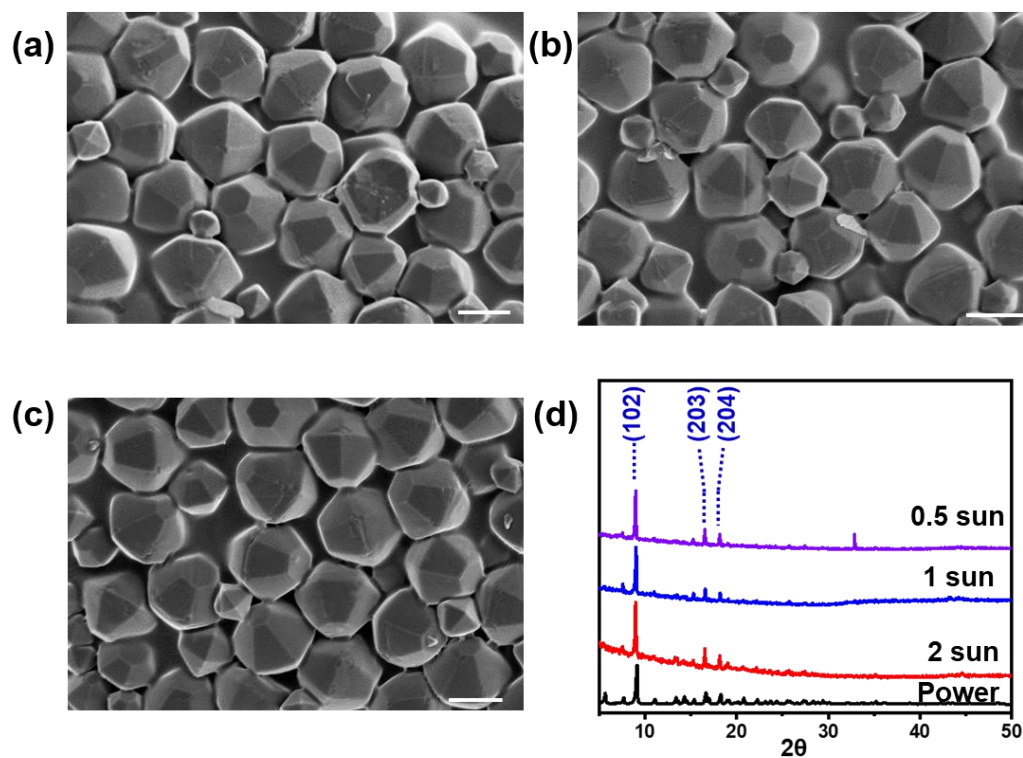

**Figure S8.** The SEM images of the MOF films prepared under different intensity of visible light. (a) 0.5 sun; (b) 1 sun; (c) 2 sun. (d) PXRD patterns of the MOF films. The intensity of 1 sun is nearly  $1 \text{ kW m}^{-2}$ .
